# Supplementary material for: Huang-Lian-Jie-Du decoction treated sepsis via regulating ERK and SRC/STAT3 pathways and ameliorating metabolic status
Source: Royal Society of Chemistry journal article supplement (doi:10.1039/c6ra17380b), 2016-01-01
Supplement: c6ra17380b1.pdf [file c6ra17380b1.pdf]

**Huang-Lian-Jie-Du decoction treated sepsis via regulating ERK and  
SRC/STAT3 pathway and ameliorating metabolic status**

Shanting Liao<sup>a,1</sup>, Pei Li<sup>a,1</sup>, Junsong Wang<sup>b\*</sup>, Qian Zhang<sup>a</sup>, Dingqiao Xu<sup>a</sup>, Yan Lv<sup>a</sup>, Minghua  
Yang<sup>a</sup>, Lingyi Kong<sup>a\*</sup>

<sup>a</sup> State Key Laboratory of Natural Medicines, Department of Natural Medicinal Chemistry, China  
Pharmaceutical University, 24 Tong Jia Xiang, Nanjing 210009, PR China. Fax/Tel: 86-25-8327-  
1405; E-mail: cpu\_lykong@126.com

<sup>b</sup> Center for Molecular Metabolism, Nanjing University of Science & Technology, 200 Xiao Ling  
Wei Street, Nanjing 210094, PR China. Tel: 86-25-8431-5512; E-mail: wang.junsong@gmail.com

**\*To whom correspondence should be address.**

Tel/Fax: +86 25 8327 1405. (Lingyi Kong); Tel: +86 25 8431 5512. (Junsong Wang)

E-mail: cpu\_lykong@126.com (Lingyi Kong); wang.junsong@gmail.com (Junsong Wang)

<sup>1</sup> These authors contributed equally to this work

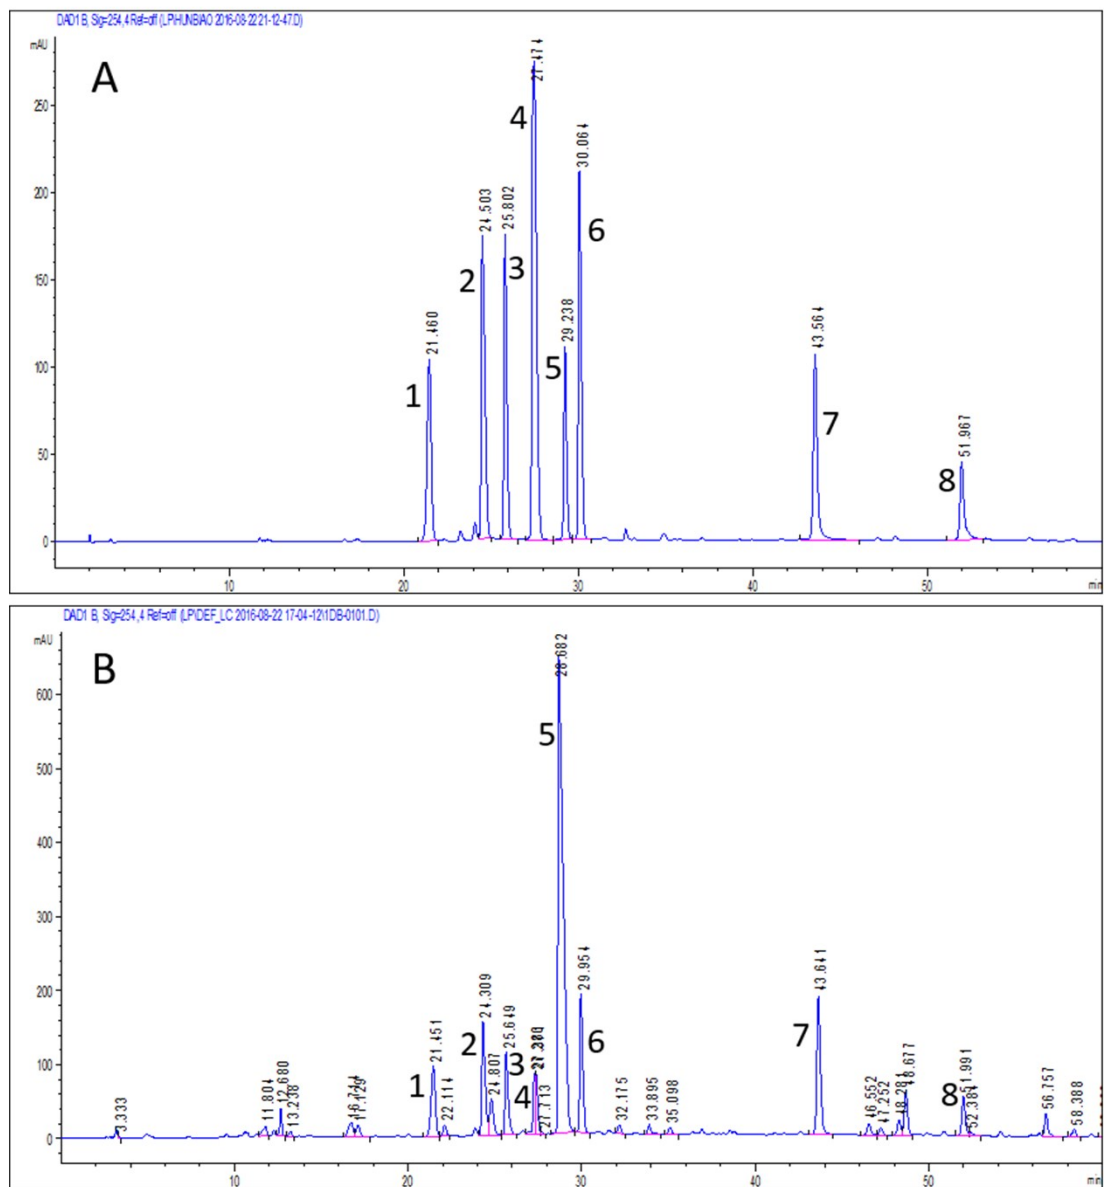

**Fig. S1** Chromatograms of standard references and Huang-Lian-Jie-Du decoction (HLJDD). (A) HPLC-UV chromatogram of standard reference at 254 nm, (1) Geniposide; (2) Coptisine; (3) Epiberberine; (4) Jatrorrhizine; (5) Berberine; (6) Palmatine; (7) Baicalin; (8) Baicalein. (B) HPLC-UV chromatograms of HLJDD monitored at 254nm.

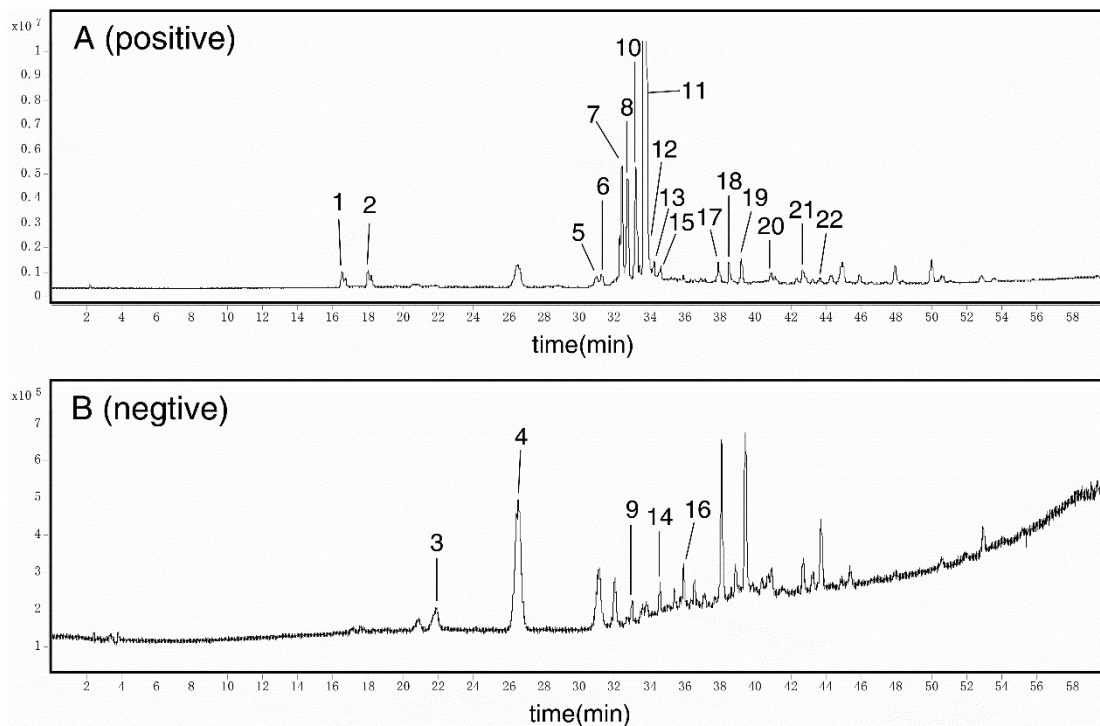

Fig. S2 The MS spectra of HLJDD in positive (A) and negative (B) ion mode.

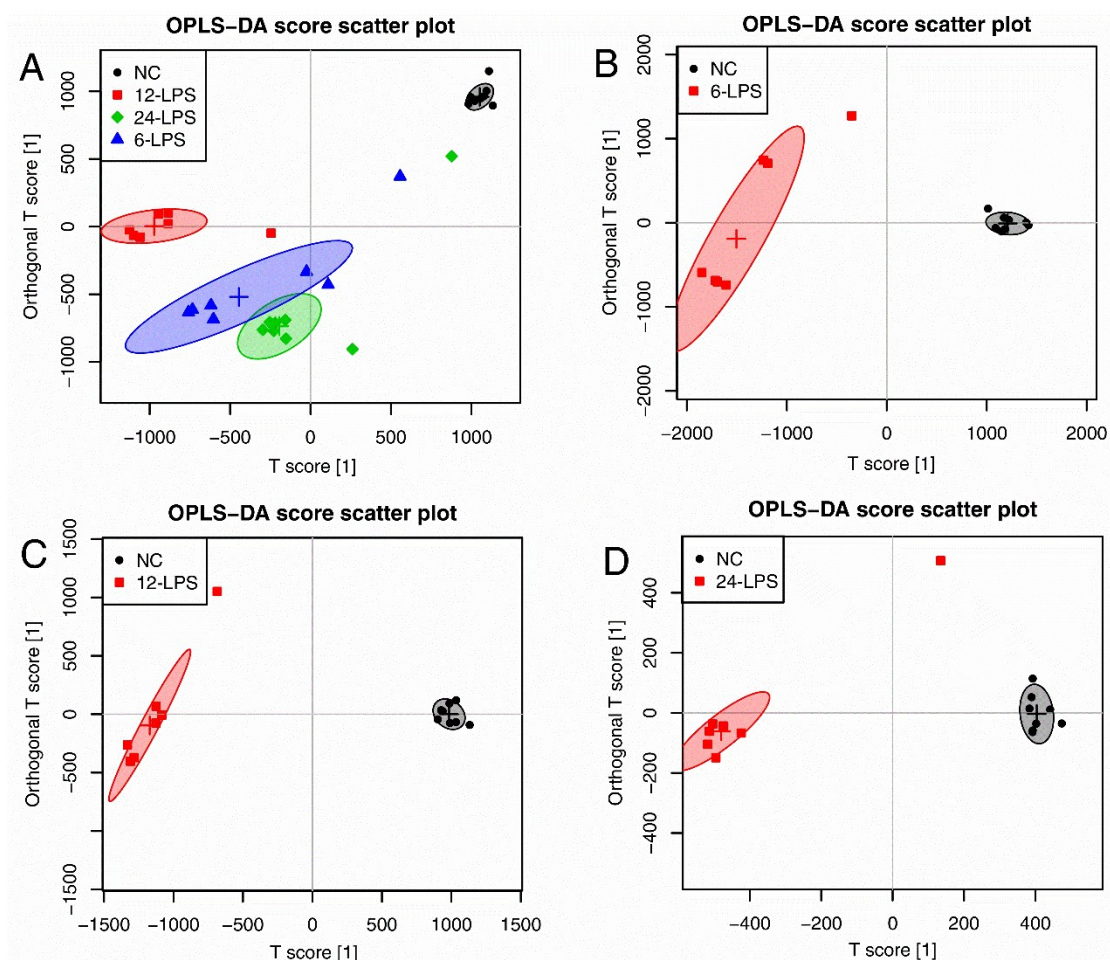

**Fig. S3** Score plots from OPLS-DA analysis of NMR data from liver extracts of NC, 6-LPS, 12-LPS and 24-LPS group.

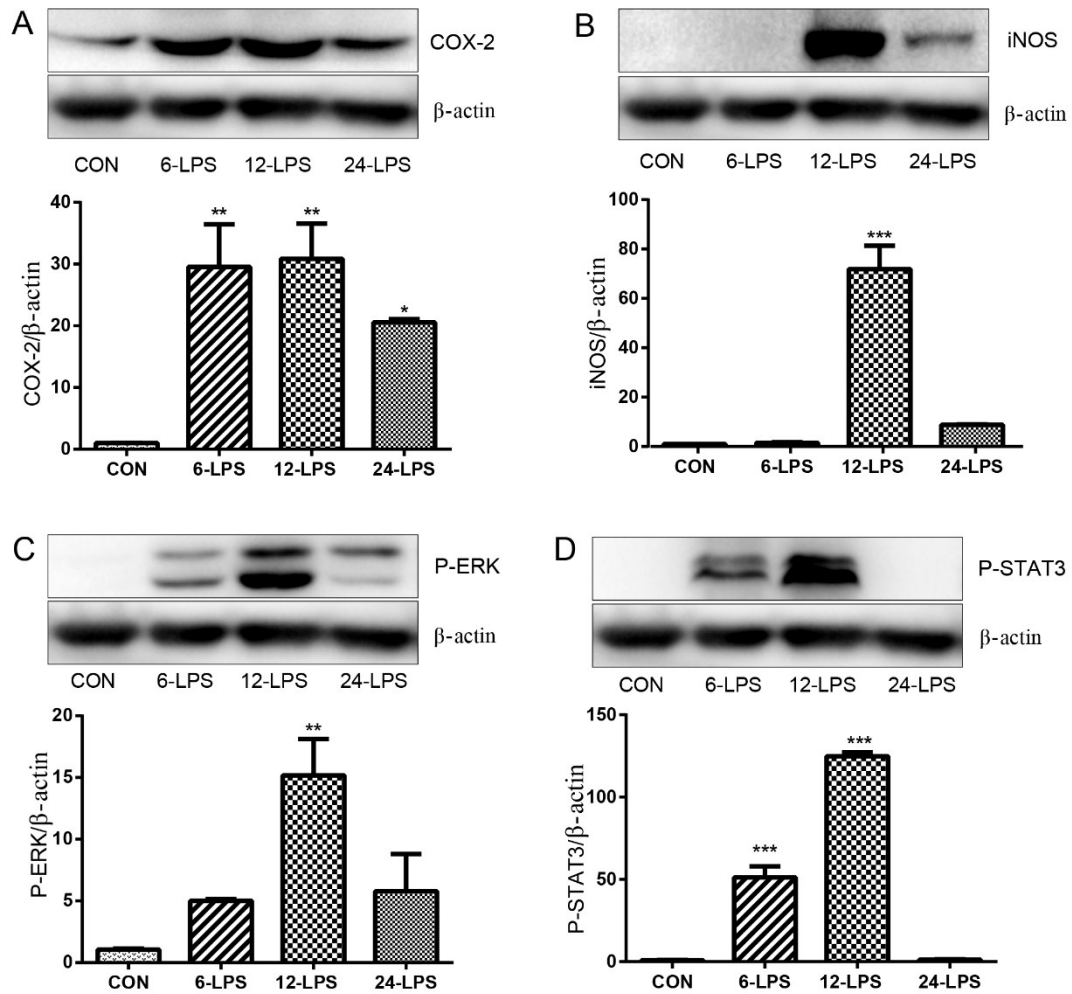

**Fig. S4** LPS activated COX-2, iNOS, P-ERK and P-STAT3 expression at the 6<sup>th</sup>, 12<sup>th</sup> and 24<sup>th</sup> hr, and peaked at the 12<sup>th</sup> hr. Western blot results of COX-2, iNOS, P-ERK and P-STAT3 and their quantitative results were showed in A, B, C and D, respectively. In western blot analysis, β-actin was as loading control. Data are expressed as “mean ± SD.” \*  $p < 0.05$ , \*\*  $p < 0.01$  and \*\*\*  $p < 0.001$  for 6-LPS, 12-LPS and 24-LPS group vs. CON group.

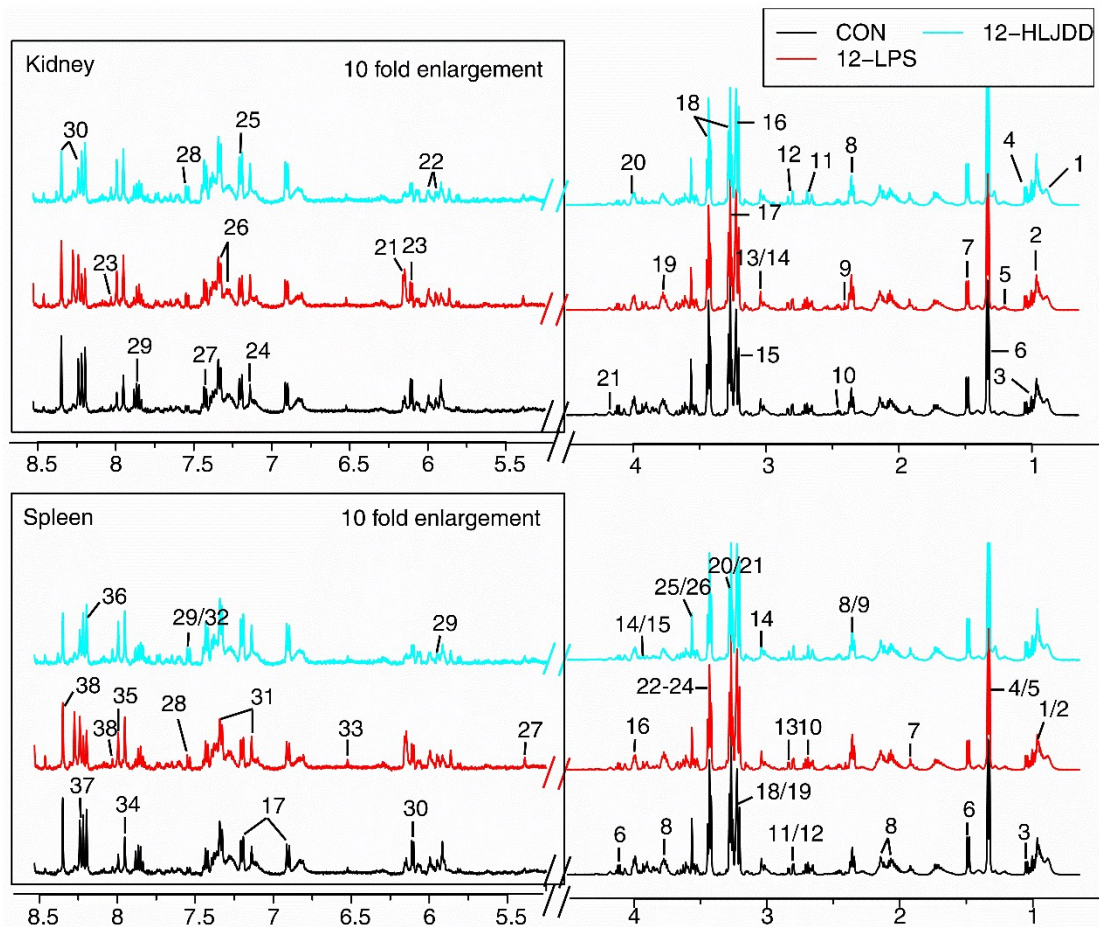

**Fig. S5** Typical 500 MHz  $^1\text{H}$  NMR spectra of liver and kidney tissue extracts obtained from the CON group (black line), 12-LPS (red line) and 12-HLJDD (green line). Metabolites in kidney extracts: 1. LDL/VLDL; 2. isoleucine (Ile); 3. leucine (Leu); 4. valine (Val); 5. maltose (Mal); 6. 3-hydroxybutyrate (3-HB); 7. lactate (Lac); 8. alanine (Ala); 9. acetate (Ace); 10.  $\alpha$ -oxoglutarate (2-OG); 11. sarcosine (Sar); 12. nicotinamide adenine dinucleotide phosphate (NADPH); 13. creatine (Cr); 14. creatinine (Cre); 15. choline (Cho); 16. phosphocholine (Pco); 17. Trimethylamine N-oxide (TMAO); 18. taurine (Tau); 19. myo-inositol (Myo); 20. betaine (Bet); 21. inosine (Ino); 22. uracil (Ura); 23. guanosine (Gua); 24. anserine (Ans); 25. tyrosine (Tyr); 26. trptophan (Trp); 27. Phenylalanine (Phe); 28. niacinamide (Nin); 29. uridine (Ude); 30. Adenosine (Ade). Metabolites in spleen extracts: 1. Ile; 2. leucine Leu; 3. Val; 4. threonine (Thr); 5. Lac; 6. Ala; 7. Ace; 8. glutamate (Gln) 9. pyruvate (Pyr); 10. glutamine (Glu); 11. succinate (Suc); 12. trimethylamine (TMA); 13. N, N-Dimethylglycine; 14. Cr; 15. creatine phosphase (Pcr); 16. Cre; 17. Tyr; 18. ethanolamine; 19. histamine (His); 20. Cho; 21. o-Phosphocholine (OPC); 22. Tau; 23. TMAO; 24. Bet; 25. Myo; 26. glycine (Gly); 27. glucose (Glc); 28. Ade; 29. Ude; 30. N-Acetylserotonin (N-Ace); 31. Ino; 32. fumarate (Fum); 33. theophylline (The); 34. xanthine (Xan); 35. guanosine (Gua); 36. Nin; 37. AMP; 38. Phe.



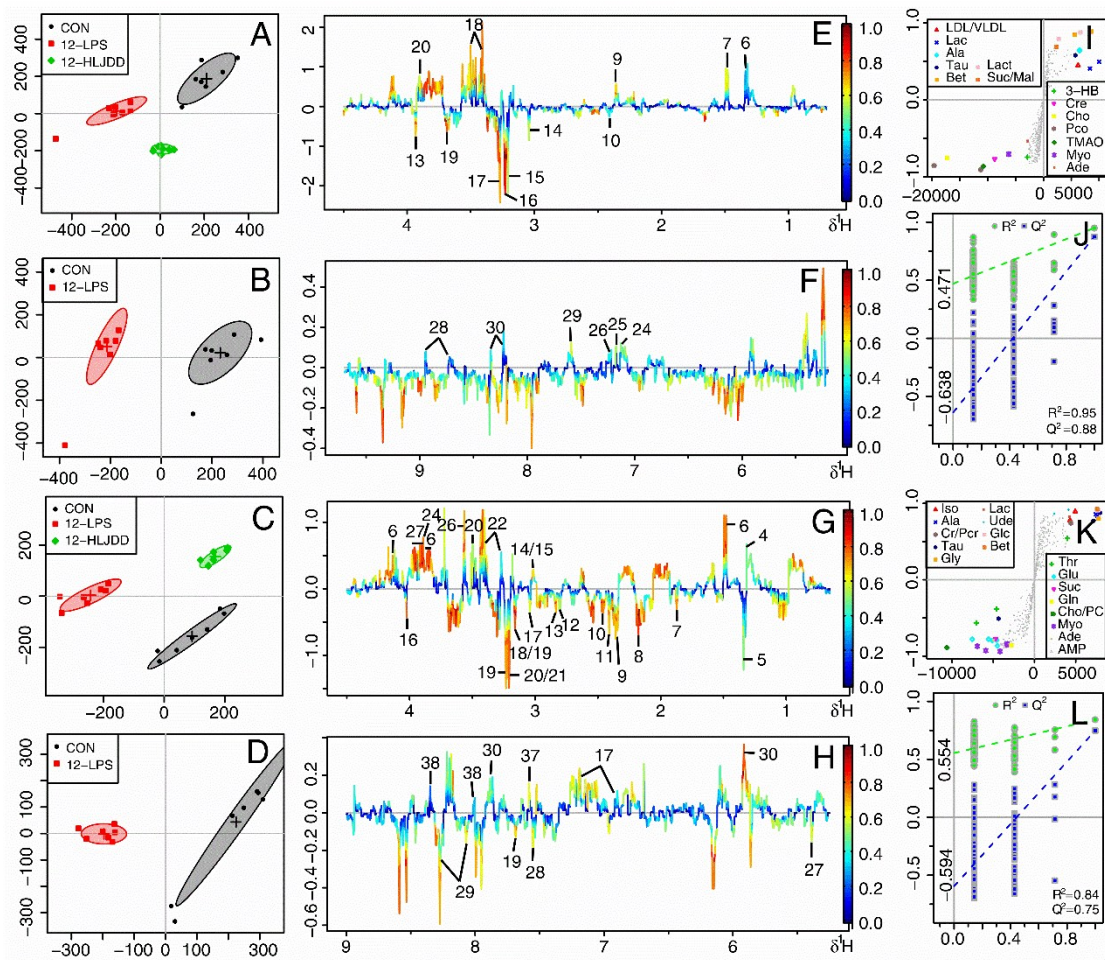

**Fig. S6** Metabolomic profiles between CON, 12-LPS and 12-HLJDD groups in kidneys and spleens. A and B (for kidneys), C and D (for spleens): scores plots for OPLS-DA; E and F (for kidneys), G and H (for spleens): OPLS-DA loading plot color-coded according to the absolute value of correlation coefficients; I (for kidneys) and K (for spleens): S-plot; J (for kidneys) and L (for spleens): OPLS-DA scatter plots of statistical validation obtained by 200 times permutation test, with  $R^2$  and  $Q^2$  values in the vertical axis, the correlation coefficient (between the permuted and true class) in the horizontal axis, and the ordinary least squares (OLS) line for the regression of  $R^2$  and  $Q^2$  on the correlation coefficients.

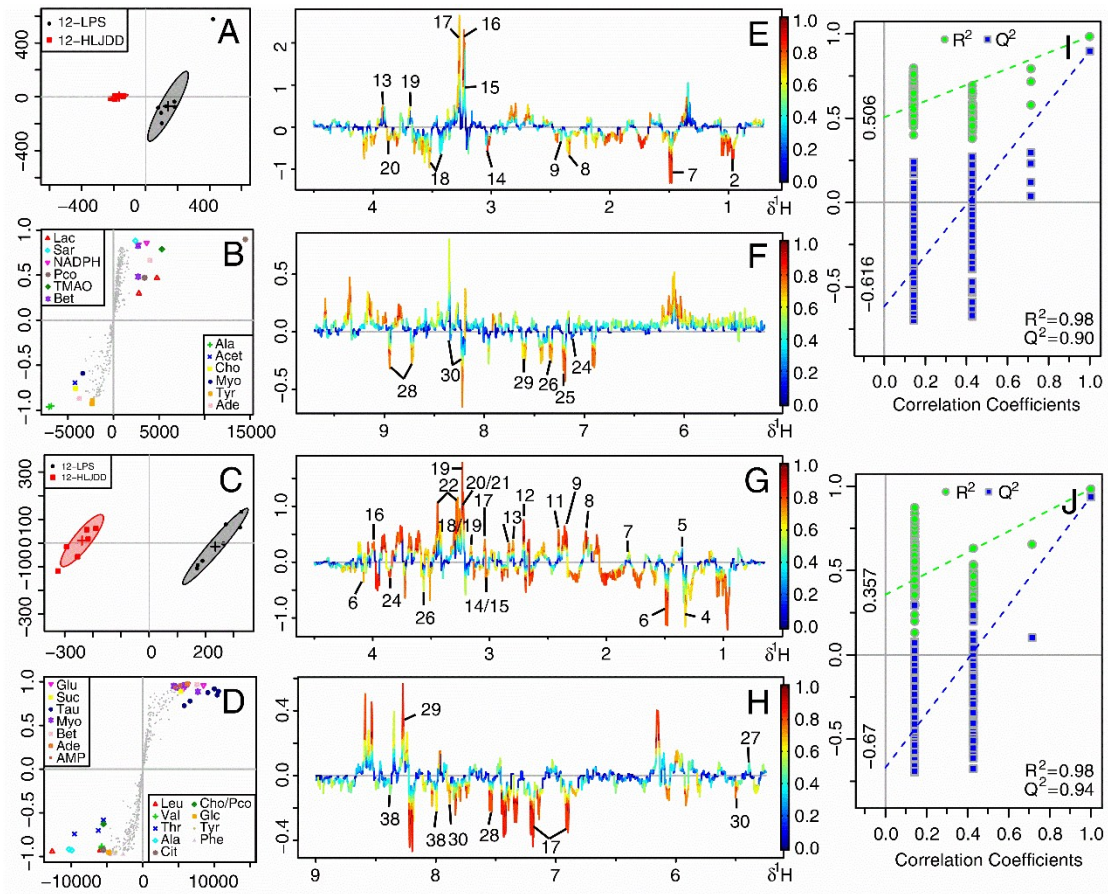

**Fig. S7** OPLS-DA analysis of <sup>1</sup>H NMR data in kidneys and spleens for 12-LPS and 12-HLJDD groups. Scores plots on 12-LPS and 12-HLJDD (A for kidneys, C for spleens), loading plot (E and F for kidneys, G and H for spleens), color-coded S-plot (B for kidneys, D for spleens) for OPLS-DA; I (for kidneys), J (for spleens) OPLS-DA scatter plots of statistical validation obtained by 200 times permutation test, with  $R^2$  and  $Q^2$  values in the vertical axis, the correlation coefficients (between the permuted and true class) in the horizontal axis, and the OLS line for the regression of  $R^2$  and  $Q^2$  on the correlation coefficients.

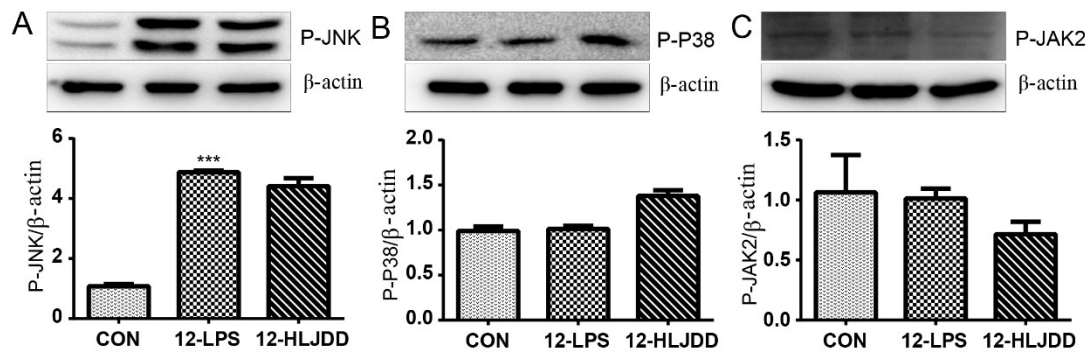

**Fig. S8** Western blot results of P-JNK, P-P38, P-JAK2 expression and their quantitative results were showed in A, B and C, respectively. In western blot analysis,  $\beta$ -actin was as loading control. Data are expressed as “mean  $\pm$  SD.” \*  $p < 0.05$ , \*\*  $p < 0.01$  and \*\*\*  $p < 0.001$  for 6-LPS, 12-LPS and 24-LPS group vs. CON group.

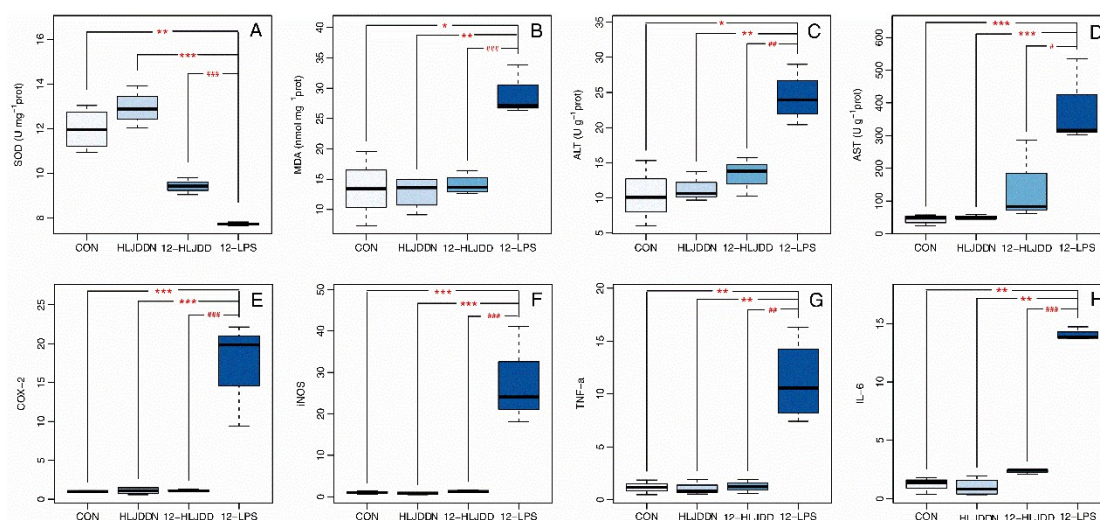

**Fig. S9** Boxplots for mRNA expression levels of COX-2 (A), iNOS (B), TNF- $\alpha$  (C), IL-6 (D) and clinical chemistry results on SOD (E), MDA (F), ALT (G), AST (H). The bottom of each box, the line drawn in the box and the top of the box represent the 1st, 2nd, and 3rd quartiles, respectively. The bars (or “whiskers”) represent the furthest observation lying within 1.5 times the interquartile range (from the 1st to 3rd quartile). \*  $p < 0.05$ , \*\*  $p < 0.01$  and \*\*\*  $p < 0.001$  for 12-LPS group vs. CON group or HLJDDN group; #  $p < 0.05$ , ##  $p < 0.01$  and ###  $p < 0.001$  for 12-HLJDD group vs. 12-LPS group.

**Table S1** The sequences of primers used for real-time RT-PCR assays

| Genes          | Forward primer (5'-3') | Reverse primer (5'-3') |
|----------------|------------------------|------------------------|
| $\beta$ -actin | ACCACACCTTCTACAATGAG   | ACGACCAGAGGCATACAG     |
| TNF- $\alpha$  | GACAGTGACCTGGACTGTGG   | GAGACAGAGGCAACCTGACC   |
| IL-6           | CAGAAGGAGTGGCTAAGGACC  | AACGCACTAGGTTTGCCGA    |
| COX-2          | TGAGTGGGGTGATGAGCAAC   | TTCAGAGGCAATGCGGTTCT   |
| iNOS           | ATCCATCCCTGAGCAATGTG   | GACCGTCTAATGGGGAGCG    |

TNF- $\alpha$ : Tumor Necrosis Factor- $\alpha$ ; IL-6: interleukin-6; COX-2: Cyclooxygenase-2; iNOS: inducible nitric oxide synthase.

**Table S2** Identified metabolites with the fold change between different groups and p-value<sup>a</sup>.

| Metabolite               | Assignments                               | Chemical shift (ppm)    | 12-LPS vs. CON |         | 12-HLJDD vs. 12-LPS |         |
|--------------------------|-------------------------------------------|-------------------------|----------------|---------|---------------------|---------|
|                          |                                           |                         | Fold Change    | P-value | Fold Change         | P-value |
| LDL/VLDL                 | $\gamma$ CH <sub>3</sub> , $\beta$ CH     | 0.89 (m), 1.20-1.30 (m) | 0.58           |         | 1.05                |         |
| $\beta$ -hydroxybutyrate | CH <sub>3</sub> , CH                      | 1.19 (d)                | 1.60           | **      | 0.89                |         |
| lactate                  | $\beta$ CH <sub>3</sub> , $\alpha$ CH     | 1.32 (d), 4.1 (q)       | 0.80           |         | 1.07                |         |
| alanine                  | CH <sub>3</sub>                           | 1.47 (d), 3.77 (q)      | 0.76           | *       | 1.42                | *       |
| acetoacetate             | CH <sub>2</sub>                           | 2.35 (s)                | 0.86           |         | 1.05                |         |
| $\alpha$ -oxoglutarate   | CH <sub>2</sub>                           | 2.45 (t), 3.02 (t)      | 1.03           |         | 1.10                |         |
| sarcosine                | CH                                        | 2.71 (s)                | 1.01           |         | 0.84                |         |
| NADPH                    | CH <sub>2</sub> , CH <sub>3</sub>         | 2.80 (dt)               | 1.34           |         | 0.21                | **      |
| creatinine               | N-CH <sub>3</sub> , N-CH <sub>2</sub> -CO | 3.02 (s), 3.92 (s)      | 0.99           |         | 2.00                | **      |



|        |                        |                                                                     |                                        |      |     |      |     |
|--------|------------------------|---------------------------------------------------------------------|----------------------------------------|------|-----|------|-----|
|        | creatinine             | N(CH <sub>3</sub> ) <sub>3</sub> , N-CH <sub>2</sub>                | 3.02 (s), 3.92 (s)                     | 2.15 | **  | 1.08 |     |
|        | choline                | N-CH <sub>2</sub>                                                   | 3.19 (s), 4.1 (d)                      | 1.25 | *   | 1.08 |     |
|        | phosphocholine         | CH <sub>3</sub>                                                     | 3.21 (s)                               | 1.45 | **  | 0.87 |     |
|        | Trimethylamine N-oxide | NH <sub>2</sub> -CH <sub>2</sub> , SO <sub>3</sub> -CH <sub>2</sub> | 3.27 (s)                               | 1.42 | *   | 0.92 |     |
|        | taurine                | CH                                                                  | 3.25 (t), 3.41 (t)                     | 1.01 |     | 0.99 |     |
|        | myo-inositol           | N(CH <sub>3</sub> ) <sub>3</sub> , CH <sub>2</sub>                  | 3.52 (dd), 3.61 (t), 4.1 (s)           | 1.59 |     | 1.07 |     |
|        | betaine                | O-CH-N, N-CH=N                                                      | 3.25 (s), 3.88 (s)                     | 0.65 | **  | 0.70 | *   |
|        | inosine                | CH                                                                  | 4.27 (s), 4.42 (s), 6.09 (d), 8.22 (s) | 0.48 |     | 0.43 |     |
|        | lactose                | CH, CH <sub>2</sub>                                                 | 3.65 (m), 3.94 (m), 5.22 (d)           | 0.16 | *   | 0.84 |     |
|        | Maltose                | CH                                                                  | 3.67 (s), 3.82 (m), 4.21d, 5.39 (d)    | 0.41 |     | 0.95 |     |
|        | tyrosine               | CH <sub>3</sub> , CH <sub>2</sub> , CH                              | 3.06 (m), 3.20 (m), 6.91 (d), 7.20 (d) | 1.34 |     | 1.43 | **  |
|        | anserine               | H <sub>3</sub> /H <sub>5</sub> , C <sub>5</sub> H/C <sub>6</sub> H  | 2.68 (m), 3.03 (dd), 3.77(s), 7.08(s)  | 1.29 |     | 1.03 |     |
|        | tryptophan             | CH=CH, H <sub>2</sub> N-CH-CH <sub>2</sub>                          | 7.23 (t), 7.33 (s), 7.55 (d) 7.74(d)   | 1.51 | *   | 1.22 |     |
|        | phenylalanine          | CH=CH, CH <sub>2</sub> , CH-NH <sub>2</sub>                         | 3.13 (m), 3.28 (m), 7.32 (m), 7.42 (m) | 1.20 |     | 1.28 |     |
|        | niacinamide            | H <sub>2</sub> /H <sub>4</sub> /H <sub>5</sub> /H <sub>6</sub>      | 7.58 (dd), 8.21 (d), 8.7 (d), 8.93 (s) | 0.93 |     | 1.46 | *   |
|        | uridine                | H <sub>5</sub> , H <sub>6</sub> , H <sub>1</sub> '                  | 5.9 (d), 7.9 (d)                       | 0.99 |     | 0.95 |     |
|        | adenosine              | CH-OH, N=CH-N                                                       | 8.20 (s), 8.34 (s)                     | 1.08 |     | 0.72 | *   |
| Spleen | isoleucine             | δCH <sub>3</sub> , γCH <sub>3</sub> , αCH                           | 0.93 (t), 1.00 (d)                     | 0.88 | *** | 1.08 | *   |
|        | leucine                | δCH <sub>3</sub> , δCH <sub>3</sub> , γCH, αCH                      | 0.94 (t), 0.96 (t)                     | 0.96 |     | 1.32 | *** |
|        | valine                 | γCH <sub>3</sub> , γCH <sub>3</sub>                                 | 0.99 (d), 1.04 (d)                     | 1.08 |     | 1.21 | *** |
|        | threonine              | CH <sub>3</sub> , CH                                                | 1.34 (d), 3.60 (d)                     | 1.08 |     | 1.07 | **  |
|        | alanine                | βCH <sub>3</sub> , αCH                                              | 1.48 (d), 3.78 (q)                     | 0.75 | *** | 1.35 | *** |
|        | acetate                | CH <sub>3</sub>                                                     | 1.91 (s)                               | 1.13 | *   | 1.14 | **  |
|        | glutamate              | βCH <sub>2</sub> , γCH <sub>2</sub> , αCH                           | 2.04(m), 2.12(m), 2.34(m), 3.75(m)     | 1.15 | **  | 0.92 | *** |
|        | succinate              | CH <sub>2</sub>                                                     | 2.41 (s)                               | 1.69 |     | 0.64 | *** |
|        | glutamine              | βCH <sub>2</sub> , γCH <sub>2</sub> , αCH                           | 2.16(m), 2.46(m), 3.77(t)              | 1.27 | *   | 1.07 |     |
|        | citrate                | CH <sub>2</sub> , CH <sub>2</sub>                                   | 2.55 (d), 2.66 (d)                     | 1.06 |     | 1.03 |     |
|        | trimethylamine         | CH <sub>3</sub>                                                     | 2.88 (s)                               | 1.12 |     | 1.51 | **  |
|        | Creatine/Pcr           | CH <sub>2</sub> , CH <sub>3</sub>                                   | 3.04 (s), 3.93 (s)                     | 0.98 |     | 0.90 | *** |
|        | Choline/PC             | N(CH <sub>3</sub> ) <sub>3</sub> , N-CH <sub>2</sub>                | 3.21 (s)                               | 1.25 | *   | 1.07 | **  |
|        | taurine                | NH <sub>2</sub> -CH <sub>2</sub> , SO <sub>3</sub> -CH <sub>2</sub> | 3.25 (t), 3.43 (t)                     | 0.94 |     | 0.94 | **  |
|        | myo-inositol           | CH                                                                  | 3.27 (t), 4.07 (t)                     | 1.30 | *   | 0.85 | *** |
|        | glycine                | CH <sub>2</sub>                                                     | 3.565 (s)                              | 0.83 | **  | 1.01 |     |
|        | glucose                | CH <sub>2</sub>                                                     | 3.7-4.0 (m), 5.30 (s)                  | 0.42 | *   | 1.31 | *** |
|        | betaine                | CH <sub>2</sub>                                                     | 3.26 (s), 3.90 (s)                     | 0.62 | **  | 0.53 | *** |
|        | lactate                | CH <sub>3</sub>                                                     | 1.33 (d), 4.11 (q)                     | 0.69 | *   | 0.83 | *   |
|        | inosine                | CH <sub>3</sub> , CH <sub>2</sub>                                   | 6.10 (d), 8.34 (s)                     | 0.81 |     | 0.87 |     |
|        | uracil                 | CH, NH                                                              | 5.81 (d), 7.54 (d)                     | 1.20 |     | 1.09 |     |
|        | adenosine              | CH-OH, N=CH-N                                                       | 8.25 (s), 8.35 (s)                     | 1.44 | *   | 0.59 | *** |
|        | AMP                    | CH, CH <sub>2</sub>                                                 | 8.23 (s), 8.58 (s)                     | 3.32 | *   | 0.28 | *** |
|        | fumarate               | CH                                                                  | 6.50 (s)                               | 1.39 |     | 0.87 |     |
|        | tyrosine               | CH <sub>3</sub> , CH <sub>2</sub> , CH,                             | 6.91 (d), 7.20 (d)                     | 1.07 |     | 1.53 | *** |
|        | anserine               | CH <sub>3</sub> , CH <sub>2</sub> , CH, CH-                         | 2.68 (m), 3.77(s), 7.08(s), 8.22(s)    | 1.22 |     | 1.02 |     |
|        | phenylalanine          | CH=CH, CH <sub>2</sub> , CH-NH <sub>2</sub>                         | 7.32 (m), 7.40 (m)                     | 1.36 | *   | 1.09 |     |

|              |                                            |                                       |      |   |        |
|--------------|--------------------------------------------|---------------------------------------|------|---|--------|
| nicotinamide | CH                                         | 7.60 (dd), 8.94 (s)                   | 1.25 | * | 1.06   |
| tryptophan   | CH=CH, H <sub>2</sub> N-CH-CH <sub>2</sub> | 7.23 (t), 7.27 (t), 7.33 (s), 7.74(d) | 1.33 |   | 0.95   |
| uridine      | H5, H6, H1'                                | 5.90 (d), 7.81 (d)                    | 0.64 |   | 1.44 * |
| histamine    | CH <sub>2</sub> , CH                       | 3.24 (dd), 7.12 (s)                   | 1.60 |   | 1.02   |

<sup>a</sup> Color coded according to log<sub>2</sub> (FoldChange) using color bar . p-Value: \*p < 0.05, \*\*p < 0.01 and \*\*\*p < 0.001. Multiplicity: s, singlet; d, doublet; t, triplet; q, quartet; m, multiplet.

**Table S3** Compounds detected in HLJDD obtained by HPLC-Q-TOF-MS.

| Peak | t <sub>R</sub> (min) | Experimental<br>[M+H] <sup>+</sup> | Calculated<br>[M+H] <sup>+</sup> | Error<br>(ppm) | Molecular<br>formula                            | Proposed compound                           |
|------|----------------------|------------------------------------|----------------------------------|----------------|-------------------------------------------------|---------------------------------------------|
| 1    | 16.470               | 342.1769                           | 342.1700                         | 0.09           | C <sub>20</sub> H <sub>23</sub> NO <sub>4</sub> | Phellodenrine                               |
| 2    | 17.938               | 342.1701                           | 342.1700                         | -0.1           | C <sub>20</sub> H <sub>23</sub> NO <sub>4</sub> | Magnoflorine                                |
| 5    | 30.881               | 322.1078                           | 322.1074                         | -1.33          | C <sub>19</sub> H <sub>15</sub> NO <sub>4</sub> | Berberubine                                 |
| 6    | 31.219               | 322.1078                           | 322.1074                         | -1.34          | C <sub>19</sub> H <sub>15</sub> NO <sub>4</sub> | 3-ofernloyquini acid                        |
| 7    | 32.229               | 320.0919                           | 320.0917                         | -0.56          | C <sub>19</sub> H <sub>13</sub> NO <sub>4</sub> | Coptisine                                   |
| 8    | 32.698               | 336.1233                           | 336.1230                         | -0.89          | C <sub>20</sub> H <sub>17</sub> NO <sub>4</sub> | Epiberberine                                |
| 10   | 33.156               | 338.1392                           | 338.1387                         | -1.49          | C <sub>20</sub> H <sub>19</sub> NO <sub>4</sub> | Jatrorrhizine/Columbamine                   |
| 11   | 33.724               | 352.1554                           | 352.1543                         | -3.16          | C <sub>21</sub> H <sub>21</sub> NO <sub>4</sub> | Palmatine                                   |
| 12   | 33.756               | 336.1231                           | 336.1230                         | -0.08          | C <sub>20</sub> H <sub>17</sub> NO <sub>4</sub> | Berberine                                   |
| 13   | 34.133               | 350.1390                           | 350.1387                         | -0.99          | C <sub>21</sub> H <sub>19</sub> NO <sub>4</sub> | Unknown                                     |
| 15   | 34.531               | 528.1658                           | 528.1653                         | -0.94          | C <sub>30</sub> H <sub>25</sub> NO <sub>8</sub> | Unknown                                     |
| 17   | 37.849               | 447.0921                           | 447.0922                         | 0.19           | C <sub>21</sub> H <sub>18</sub> O <sub>11</sub> | Baicalin                                    |
| 18   | 38.536               | 447.0924                           | 447.0922                         | -0.5           | C <sub>21</sub> H <sub>18</sub> O <sub>11</sub> | Baicalinisomer                              |
| 19   | 39.218               | 461.1087                           | 461.1078                         | -1.76          | C <sub>22</sub> H <sub>20</sub> O <sub>11</sub> | Oroxylin A 7-O-glucuronide                  |
| 20   | 40.828               | 375.1082                           | 375.1074                         | -1.95          | C <sub>19</sub> H <sub>18</sub> O <sub>8</sub>  | 5,6-Dihydroxy-6,8,2',3'-tetramethoxyflavone |
| 21   | 42.640               | 285.0768                           | 285.0757                         | -3.75          | C <sub>16</sub> H <sub>12</sub> O <sub>5</sub>  | Oroxylin A                                  |
| 22   | 43.600               | 285.0766                           | 285.0757                         | -2.83          | C <sub>16</sub> H <sub>12</sub> O <sub>5</sub>  | wogonin                                     |

**Table S4** Compounds detected in HLJDD obtained by HPLC-Q-TOF-MS.

| Peak | t <sub>R</sub> (min) | Experimental<br>[M-H] <sup>-</sup> | Calculated<br>[M-H] <sup>-</sup> | Error (ppm) | Molecular<br>formula                            | Proposed compound                     |
|------|----------------------|------------------------------------|----------------------------------|-------------|-------------------------------------------------|---------------------------------------|
| 9    | 32.970               | 338.1385                           | 338.1398                         | 3.7         | C <sub>20</sub> H <sub>21</sub> NO <sub>4</sub> | Canadine                              |
| 14   | 34.520               | 547.1448                           | 547.1457                         | 1.69        | C <sub>26</sub> H <sub>28</sub> O <sub>13</sub> | Chrysin 6-C-arabinoside 8-C-glucoside |
| 16   | 35.884               | 695.2179                           | 695.2193                         | 2.02        | C <sub>32</sub> H <sub>40</sub> O <sub>17</sub> | Phelloside                            |

**Table S5** Compounds detected in HLJDD obtained by HPLC-Q-TOF-MS.

| Peak | t <sub>R</sub> (min) | Experimental<br>[M+COOH] <sup>-</sup> | Calculated<br>[M+COOH] <sup>-</sup> | Error (ppm) | Molecular<br>formula                            | Proposed compound         |
|------|----------------------|---------------------------------------|-------------------------------------|-------------|-------------------------------------------------|---------------------------|
| 3    | 21.768               | 595.1860                              | 595.1880                            | 3.36        | C <sub>23</sub> H <sub>34</sub> O <sub>15</sub> | genipin-1-β-D-gentiobiose |
| 4    | 26.493               | 433.1347                              | 433.1351                            | 1.01        | C <sub>17</sub> H <sub>24</sub> O <sub>10</sub> | Geniposide                |
